# Supplementary material
Source: publisher site journal article supplement (https://www.dovepress.com/get_supplementary_file.php?f=237726.docx)
Supplement: Supplementary file 1 [file get_supplementary_file.php]

**Supplementary Table 1 Relationship between the expression of OIP5-AS1 and EOC clinicopathologic characteristics**

Low/high by the sample median. Pearson χ2 test. P < 0.05 was considered to be statistically significant. *P < 0.05, ** P < 0.01, *** P < 0.001.

**Supplementary Table 1**

**The association between lncRNA OIP5-AS1 expression and clinical features in 40 patients with EOC**

| Variable | LncRNA OIP5-AS1 expression | | P-value |
| --- | --- | --- | --- |
| low | high |
| **Age** |  |  |  |
| ＜55 | 5 | 3 | 0.695 |
| ≥55 | 15 | 17 |
| **Tumor size** |  |  |  |
| <5 | 15 | 3 | < 0.001*** |
| ≥5 | 5 | 17 |
| **FIGO stage** |  |  |  |
| I/II | 11 | 2 | 0.006** |
| III/IV | 9 | 18 |
| **Histotype** |  |  |  |
| Serous/Mucinous | 16 | 18 | 0.661 |
| Endometrioid | 4 | 2 |
| **Grade stage** |  |  |  |
| I (well) | 9 | 6 | 0.514* |
| II (moderate) + III (poor) | 11 | 14 |  |

Low/high by the sample median. Pearson χ2 test. P < 0.05 was considered to be statistically significant. *P < 0.05, ** P < 0.01, *** P < 0.001.

**Supplementary Table 2 Sequences of related primers for PCR**

| **Genes** | **Primer sequences (5'-3')** |
| --- | --- |
| OIP5-AS1 | F: GAAGATGGCGGAGTAAGGC |
|  | R: AATGTTCGGTTAGTTCCTCTCC |
| ZNF217 | F: TTTTGGAACCCAGGGCTGTT |
|  | R: CTCCATCTCCATCGGACTGC |
| KHDC4 | F: AGAGGAGCTACCAGATGAACGG |
|  | R: TGCCTGAGGAACTTGCTGGCTT |
| EIF1 | F: ACTGTCCAAGGGATCGCTGATG |
|  | R: TCTTGCGTTGGTCACCCTGTAG |
| SS18 | F: CTTCAGATGGAATGGTAGGTGG |
|  | R: TTGAGTTGATTGGGTCCAGG |
| NCKAP5 | F: CATCGGCAGCTCTATCAGTAC |
|  | R: TGCATCGTCTTCATCCTCTTG |
| UGP2 | F: GCAGGAGCAAAATGCCATTGACA |
|  | R: CAGAAAACGGCTCCTTGGCACA |
| ANKRD28 | F: GGAGTGCCTAAACCTTCTGCTG |
|  | R: CCACAAGAGCAAACAGGCACTG |
| TMF1 | F: TTTACGCCATGAGATCGGTG |
|  | R: TTGACTCAGTTCCTGGTTTCG |
| MITF | F: GGCTTGATGGATCCTGCTTTGC |
|  | R: GAAGGTTGGCTGGACAGGAGTT |
| PDCD6 | F: ACATCACGGACTGGCAGAACGT |
|  | R: AGGATGTCGTGGAACTGGTCAG |
| SLC35A4 | F: GATGCTACTCCTATCCACTGCC |
|  | R: GGCGCATAACAGTAGCTTGGTC |
| MEGF9 | F: CAGAGTCCTGATGCCACTAAAG |
|  | R: CACATTTATTGCAGTTCGGGC |
| SLC25A5 | F: CTGATGGGATTAAGGGCCTG |
|  | R: ACGATGTGAGTGTTCTTGGG |
| GAPDH | F: CTCTGCTCCTCCTGTTCGAC |
|  | R: GCGCCCAATACGACCAAATC |
| miR-137 | F: ACACTCCAGCTGGGTTATTGCTTAAGAATAC |
|  | R: TGGTGTCGTGGAGTCG |
| miR-2682-5p | F: ACACTCCAGCTGGGCAGGCAGTGACTGTTCA |
|  | R: TGGTGTCGTGGAGTCG |
| miR-141-3p | F: ACACTCCAGCTGGGTAACACTGTCTGGTAA |
|  | R: TGGTGTCGTGGAGTCG |
| U6 | F: CTCGCTTCGGCAGCACA |
|  | R: AACGCTTCACGAATTTGCGT |
